# Supplementary material for: Protective Effect of Prunus Cerasus (Sour Cherry) Seed Extract on the Recovery of Ischemia/Reperfusion-Induced Retinal Damage in Zucker Diabetic Fatty Rat
Source: MDPI journal article supplement (doi:10.3390/molecules22101782), 2017-10-21
Supplement: s1 [file s1]

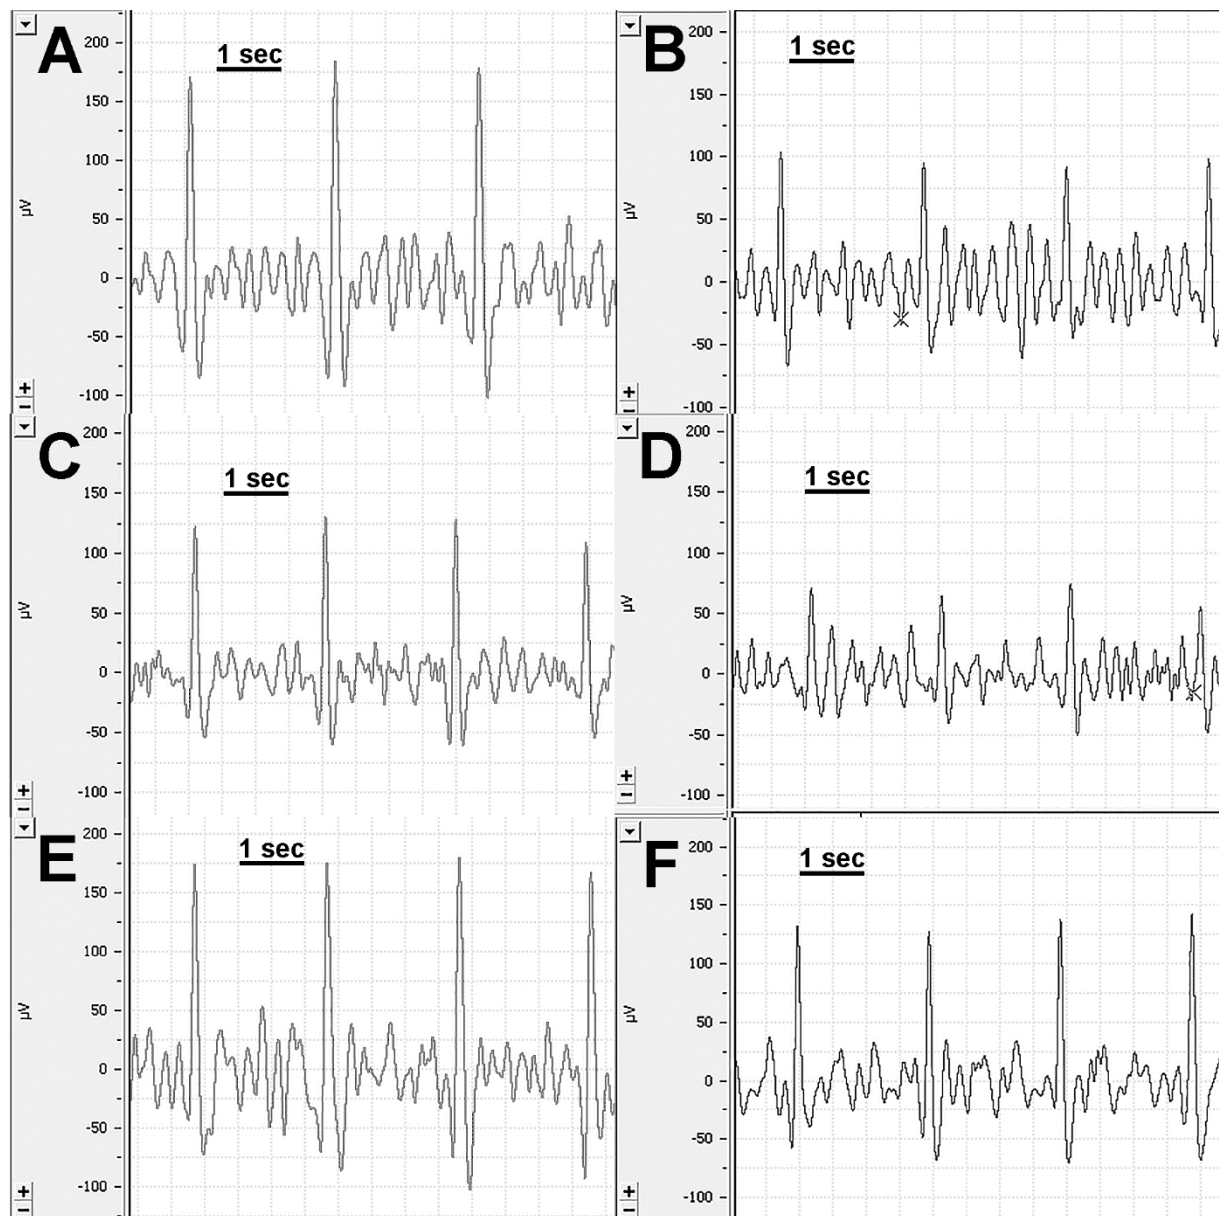

**Supplementary Figure 1.** Representative electroretinograms for each experimental group.

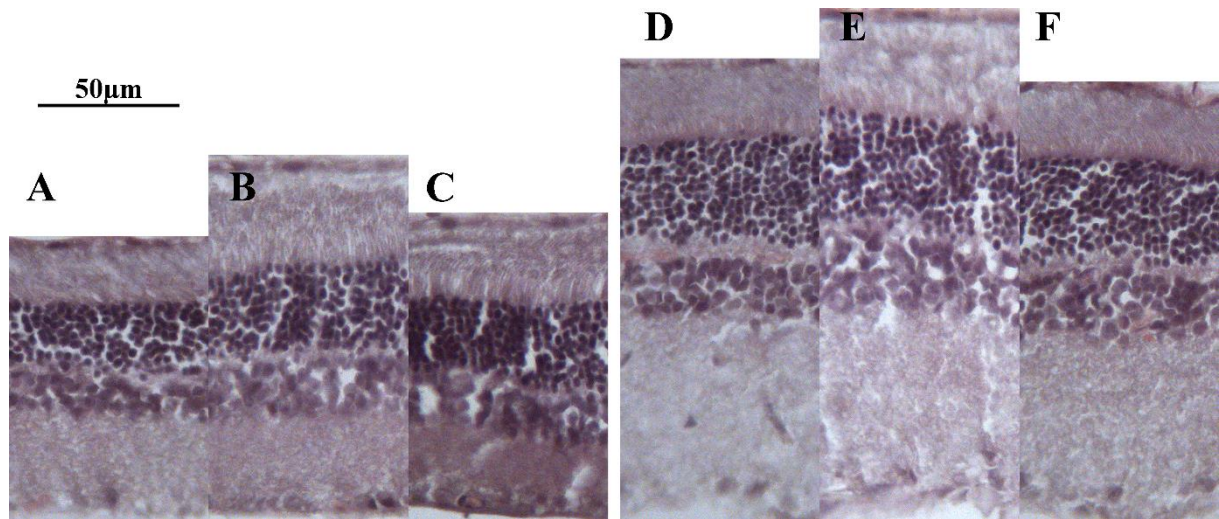

**Supplementary Figure 2.** Hematoxylin-eosin-dyed representative sections of retinæ from bulbi of the different groups. (a): healthy non-I/R; (b): control non-I/R; (c): treated non-I/R; (d): healthy I/R; (e): control I/R; (f): treated I/R
